# Supplementary material
Source: MDPI journal article supplement (https://www.mdpi.com/1999-4907/12/10/1372)
Supplement: s1 [file s1]

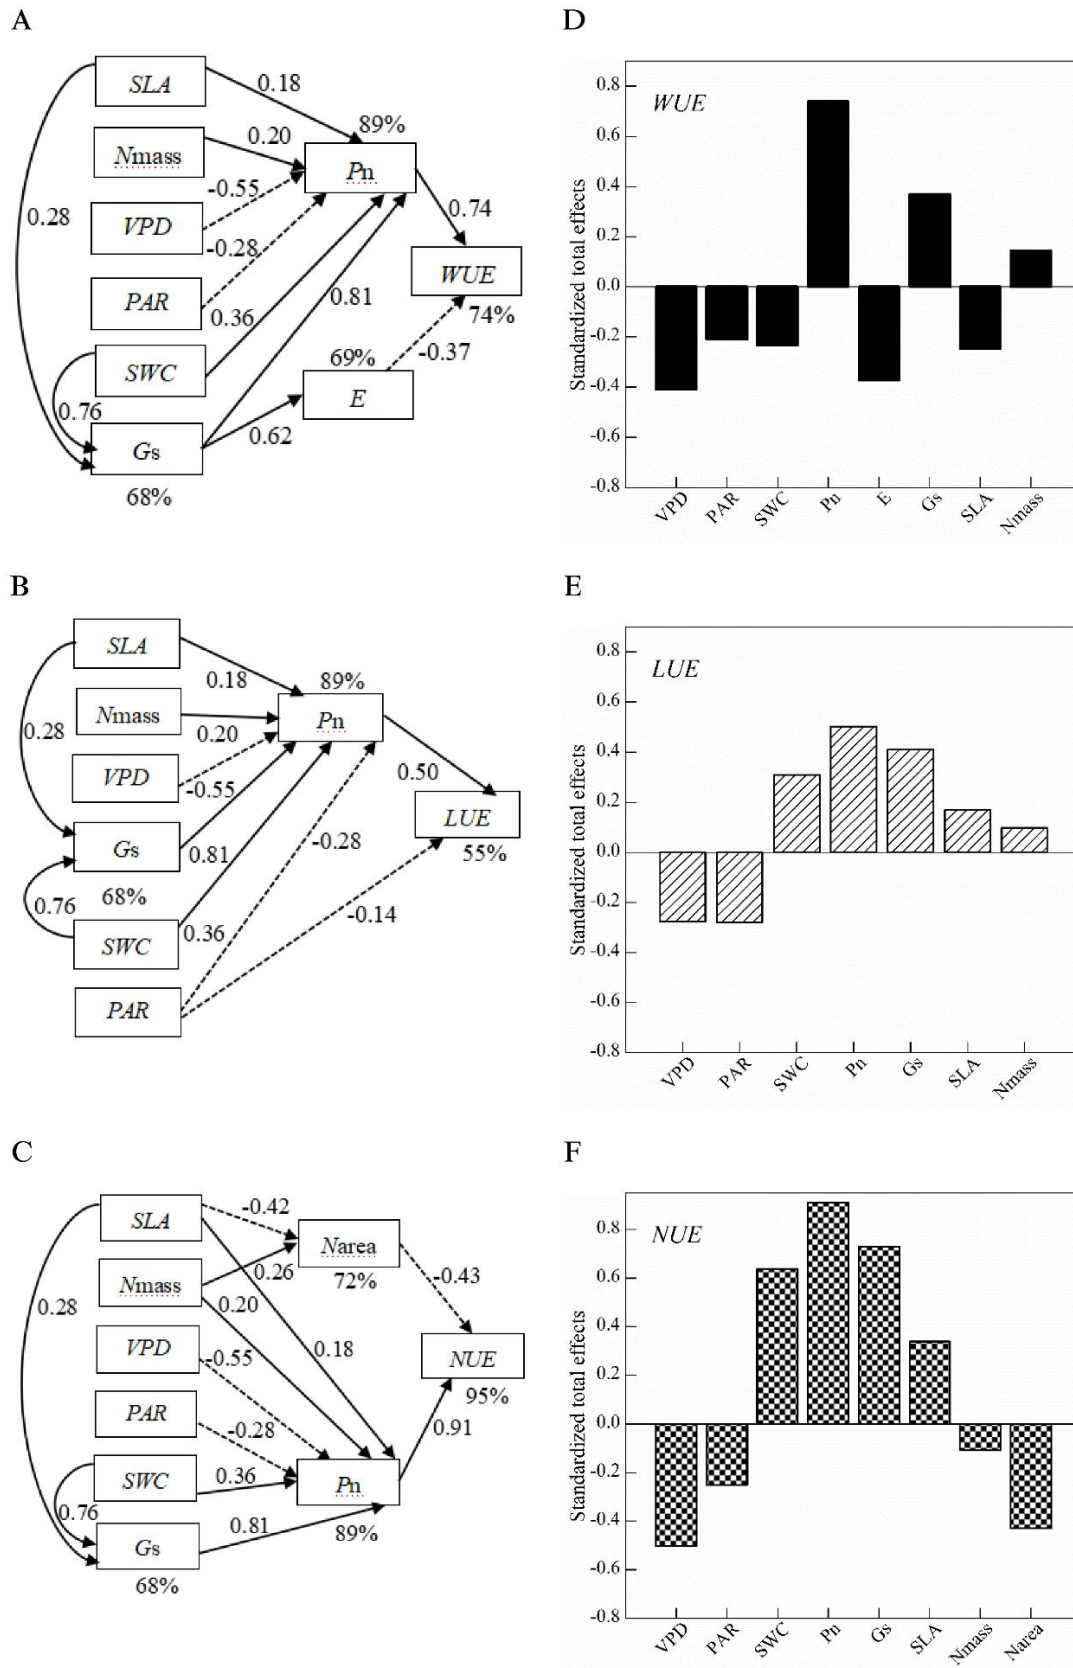

**Figure S1.** Structural equation modelling (SEM, sub-figures A–C) and standardized total effect (D–F) showing the effect of abiotic and biotic factors on RUEs in *A. ordosica*. The numbers beside each arrow are the standardized path coefficients ( $\gamma$ ), the solid and dashed line arrows represent the positive and negative effects on the fitted SEM, respectively. All paths in this model are significant ( $p$

< 0.01). Percentages beside the response variables refer to the proportion of variance explained by the model ( $R^2$ ). The statistical results of the SEM are: (A)  $WUE$ ,  $\chi^2 = 44.6$ ,  $p = 0.689$ , and RMSEA (root mean square error of approximation) = 0.001; (B)  $LUE$ ,  $\chi^2 = 51.41$ ,  $p = 0.418$ , and RMSEA = 0.026; and (C)  $NUE$ ,  $\chi^2 = 44.76$ ,  $p = 0.093$ , and RMSEA = 0.001.

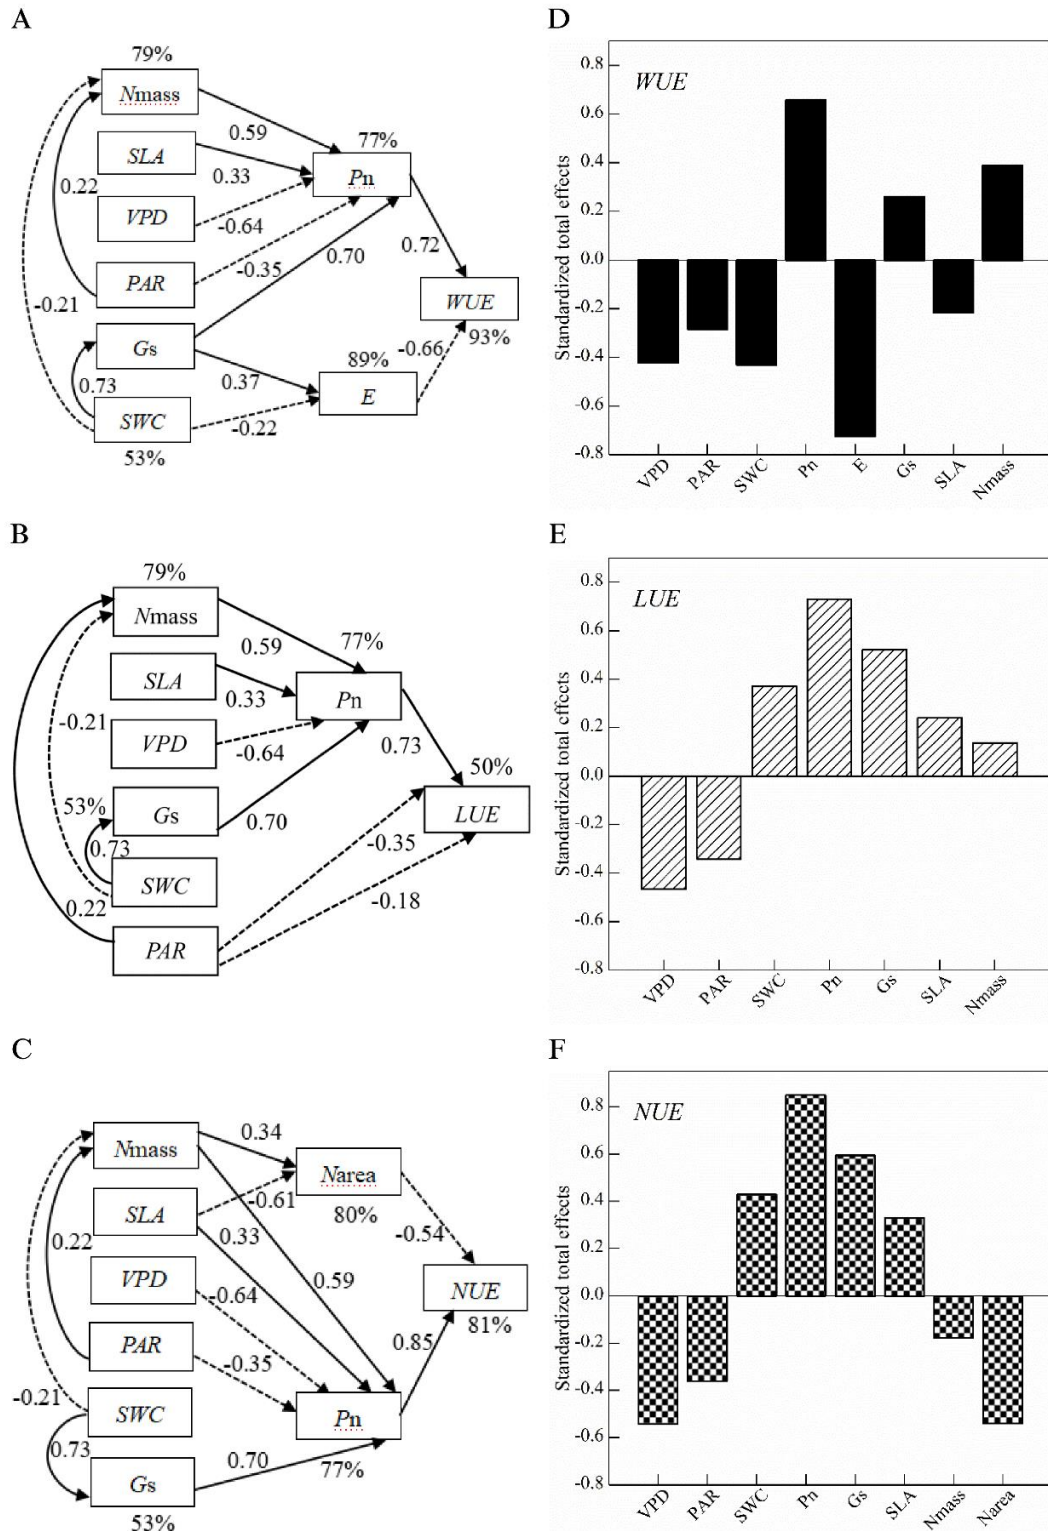

**Figure S2.** Structural equation modelling (SEM, sub-figures A–C) and standardized total effect (D–F) showing the effect of abiotic and biotic factors on RUEs in *L. secalinus*. The numbers beside each arrow are the standardized path coefficients ( $\gamma$ ), the solid line arrows represent the positive and dashed line arrows represent the negative effects on the fitted SEM, respectively. All paths in this model are significant ( $P < 0.01$ ). Percentages beside the response variables refer to the proportion of variance explained by the model ( $R^2$ ). The statistical results of the SEM are: (A)  $WUE$ ,  $\chi^2 = 32.14$ ,  $p = 0.696$ , and RMSEA (root mean

square error of approximation) = 0.001; (B) *LUE*,  $\chi^2 = 33.01$ ,  $P = 0.657$ , and  $RMSEA = 0.001$ ; and (C) *NUE*,  $\chi^2 = 38.97$ ,  $p = 0.381$ , and  $RMSEA = 0.037$ .

**Table S1.** Partial correlation coefficients between *RUEs* [i.e., water, light, and nitrogen use efficiencies (i.e., *WUE*, *LUE*, and *NUE*)] and biophysical variables of photosynthesis (*Pn*), transpiration (*E*), incident photosynthetically active radiation (*PAR*), and N per unit leaf area (*N<sub>area</sub>*) from 1 May–30 Sep. 2019 for *A. ordosica* and *L. secalinus*.

| <i>RUEs</i> | <i>A. ordosica</i>      |         | <i>L. secalinus</i>     |         |
|-------------|-------------------------|---------|-------------------------|---------|
|             | Components              | PCC     | Components              | PCC     |
| <i>WUE</i>  | <i>Pn</i>               | 0.89**  | <i>Pn</i>               | 0.78**  |
|             | <i>E</i>                | −0.58** | <i>E</i>                | −0.72** |
| <i>LUE</i>  | <i>Pn</i>               | 0.49**  | <i>Pn</i>               | 0.46**  |
|             | <i>PAR</i>              | NA      | <i>PAR</i>              | NA      |
| <i>NUE</i>  | <i>Pn</i>               | 0.98**  | <i>Pn</i>               | 0.93**  |
|             | <i>N<sub>area</sub></i> | −0.41** | <i>N<sub>area</sub></i> | −0.75** |

Note \*\*\* denotes  $p < 0.01$  and NA for no statistically significant correlation (i.e.,  $p > 0.20$ ).
